# Supplementary material for: Postmortem CT is more accurate than clinical diagnosis for identifying the immediate cause of death in hospitalized patients: a prospective autopsy-based study
Source: Springer Nature journal article supplement (doi:10.1007/s00428-016-1937-6), 2016-04-16
Supplement: MOESM1 [file 10019518]

Supplemental Table 1. Sequential causes of death in each patient as diagnosed by pathologists

| Group   | Age | Sex | Time after death (h) | Underlying cause of death                       | Intermediate cause of death                                          | Immediate cause of death                                         |
|---------|-----|-----|----------------------|-------------------------------------------------|----------------------------------------------------------------------|------------------------------------------------------------------|
| Group 1 | 82  | M   | 1.25                 | Aspiration pneumonia                            | Diffuse alveolar damage                                              | Respiratory failure due to diffuse alveolar damage               |
|         | 89  | F   | 1.75                 | Overt leukemia from myelodysplastic syndrome    | Pneumonia with shock                                                 | Respiratory failure due to diffuse alveolar damage               |
|         | 1   | M   | 3.25                 | Primary immunodeficiency with thymic aplasia    | Pneumonia                                                            | Diffuse alveolar damage                                          |
|         | 81  | F   | 14                   | Miliary tuberculosis                            | Diffuse alveolar damage                                              | Diffuse alveolar damage                                          |
|         | 88  | F   | 15                   | Ascending colon cancer                          | Perforation of colon cancer                                          | Septic shock due to pan-peritonitis                              |
|         | 75  | M   | 2                    | Systemic lupus erythematosus                    | Invasive aspergillosis due to immunodeficiency                       | Respiratory failure due to septic shock                          |
|         | 69  | F   | 9.5                  | Chronic myelomonocytic leukemia                 | Immunodeficiency                                                     | Respiratory failure due to diffuse alveolar damage               |
|         | 63  | M   | 10.75                | Lingual cancer                                  | Aspiration due to pharyngocutaneous fistula                          | Respiratory failure due to bronchopneumonia and pleural effusion |
|         | 68  | M   | 27                   | Lung cancer                                     | Multiple cancer metastases                                           | Respiratory failure due to bronchopneumonia and pleural effusion |
|         | 78  | M   | 2.5                  | Esophageal cancer                               | Aspiration pneumonia                                                 | Respiratory failure due to aspiration pneumonia                  |
|         | 64  | F   | 2                    | Pancreatic cancer                               | Adverse effects of gemcitabine                                       | Respiratory failure due to idiopathic interstitial pneumonia     |
|         | 72  | M   | 2.25                 | Usual interstitial pneumonia                    | Aspiration pneumonia + pulmonary bleeding                            | Respiratory failure due to CO <sub>2</sub> narcosis              |
|         | 77  | M   | 16                   | Liver cancer                                    | Pleuritis carcinomatosa                                              | Respiratory failure due to pleuritis carcinomatosa               |
|         | 74  | M   | 11                   | Traffic injury with polycythemia vera           | Pulmonary thromboembolism                                            | Respiratory failure due to pulmonary embolism                    |
|         | 51  | M   | 7.25                 | Pancreatic head cancer                          | Pleuritis carcinomatosa with pneumothorax                            | Respiratory failure                                              |
|         | 14  | F   | 41                   | Unknown (Sudden death)                          | Diffuse alveolar bleeding                                            | Suffocation                                                      |
|         | 45  | F   | 3.5                  | Leiomyosarcoma of uterus                        | Peritonitis carcinomatosa                                            | Hemorrhagic shock due to tumor necrosis                          |
|         | 60  | F   | 1.75                 | Pancreatic head cancer                          | Ruptured metastatic liver tumor                                      | Hemorrhagic shock due to perforation of liver tumor              |
|         | 85  | F   | 11                   | Lower bile duct cancer                          | Liver metastasis and obstructive jaundice                            | Liver failure                                                    |
| Group 2 | 65  | M   | 5.5                  | Chronic myelomonocytic leukemia                 | Systemic inflammatory response syndrome                              | Respiratory failure due to septic shock                          |
|         | 62  | F   | 4                    | Pancreatic cancer                               | Diffuse alveolar damage and lung metastasis                          | Respiratory failure due to diffuse alveolar damage               |
|         | 79  | M   | 15                   | Hodgkin lymphoma                                | Systemic inflammatory response syndrome                              | Diffuse alveolar damage                                          |
|         | 73  | M   | 6.25                 | Pancreatic head cancer                          | Disseminated intravascular coagulation                               | Diffuse alveolar damage                                          |
|         | 62  | M   | 1.75                 | Peritonitis carcinomatosa due to gastric cancer | Severe immunodeficiency                                              | Respiratory failure due to bronchopneumonia and pleural effusion |
|         | 46  | M   | 9.75                 | Amyotrophic lateral sclerosis                   | Aspiration                                                           | Respiratory failure due to pneumonia and pulmonary abscess       |
|         | 76  | F   | 2                    | Cecal cancer                                    | Multiple lung abscesses                                              | Respiratory failure due to pulmonary abscess                     |
|         | 86  | M   | 21                   | Pancreatic head cancer                          | Bronchopneumonia + multiple lung metastases                          | Respiratory failure due to bronchopneumonia                      |
|         | 77  | M   | 17                   | Pulmonary emphysema                             | Bronchopneumonia                                                     | Respiratory failure due to bronchopneumonia                      |
|         | 65  | M   | 7                    | Drug-induced neutropenia                        | Severe systemic infection                                            | Severe bronchopneumonia                                          |
|         | 59  | M   | 3                    | Diabetic nephropathy                            | Massive ascites                                                      | Respiratory failure due to passive atelectasis                   |
|         | 77  | M   | 6.5                  | Ureteropelvic cancer                            | Carcinomatous lymphangitis + massive pleural effusion                | Respiratory failure                                              |
|         | 71  | M   | 4.5                  | Usual interstitial pneumonia                    | Organizing pneumonia                                                 | Respiratory failure                                              |
|         | 60  | M   | 10                   | Mediastinal tumor                               | Tracheal compression by mass effect                                  | Suffocation                                                      |
|         | 62  | F   | 17.25                | Angiosarcoma                                    | Pericardial hemorrhage                                               | Cardiac tamponade                                                |
|         | 79  | F   | 3.5                  | Gastric cancer                                  | Pericarditis carcinomatosa                                           | Cardiac tamponade                                                |
|         | 71  | M   | 3.5                  | Gastric body cancer                             | Metastatic liver cancer                                              | Liver failure                                                    |
|         | 62  | M   | 2.75                 | Pancreatic head cancer                          | Multiple liver metastasis                                            | Liver failure                                                    |
| Group 3 | 68  | M   | 1.75                 | Myelodysplastic syndrome                        | Immunodeficiency                                                     | Septic shock                                                     |
|         | 68  | M   | 12.5                 | Old myocardial infarction                       | Acute coronary syndrome due to plaque rupture and thrombus formation | Acute myocardial infarction                                      |
|         | 56  | F   | 2                    | Endometrial cancer                              | Pan-peritonitis due to Pseudomonas infection                         | Multiple-organ failure                                           |
|         | 71  | M   | 14.75                | Bile duct cancer                                | Sub-massive liver necrosis due to portal thrombus                    | Liver failure due to submassive liver necrosis                   |
| Group 4 | 57  | M   | 2                    | Lymphoplasmacytic lymphoma/leukemia             | Alveolar bleeding                                                    | Respiratory failure                                              |
|         | 70  | F   | 11                   | Carcinosarcoma of uterus                        | Bronchopneumonia                                                     | Respiratory failure                                              |
|         | 67  | M   | 9                    | Esophageal cancer                               | Multiple cancer metastases                                           | Pulmonary tumor embolism                                         |
|         | 76  | M   | 2                    | Primary macroglobulinemia                       | Right heart failure                                                  | Suspect of acute circulatory failure                             |
|         | 94  | F   | 3                    | Bronchopneumonia                                | Sepsis                                                               | Acute circulatory failure                                        |
|         | 66  | F   | 12.5                 | Liver cancer due to alcoholic liver cirrhosis   | Radiation injury of the liver                                        | Liver failure                                                    |
|         | 60  | F   | 4.75                 | Gastric cancer                                  | Liver metastasis                                                     | Liver failure                                                    |
|         | 81  | F   | 3.5                  | Splenic marginal zone B-cell lymphoma           | Tumor invasion of the cirrhotic liver                                | Liver failure                                                    |
|         | 64  | F   | 1.75                 | Acute myelocytic leukemia                       | Tumor invasion of the liver                                          | Hepatorenal failure                                              |
