# Supplementary material for: Postmortem CT is more accurate than clinical diagnosis for identifying the immediate cause of death in hospitalized patients: a prospective autopsy-based study
Source: Springer Nature journal article supplement (doi:10.1007/s00428-016-1937-6), 2016-04-16
Supplement: MOESM2 [file 10019518]

Supplemental Table 2. Concordance of the diagnosis of immediate cause of death by three different methods

| Group   | Age | Sex | Immediate cause of death                                 |                                                                  |                                                                |
|---------|-----|-----|----------------------------------------------------------|------------------------------------------------------------------|----------------------------------------------------------------|
|         |     |     | Clinical diagnosis                                       | Hospital autopsy                                                 | Postmortem CT                                                  |
| Group 1 | 82  | M   | Acute respiratory distress syndrome                      | Respiratory failure due to diffuse alveolar damage               | Respiratory failure due to acute respiratory distress syndrome |
|         | 89  | F   | Respiratory failure                                      | Respiratory failure due to diffuse alveolar damage               | Respiratory failure due to acute respiratory distress syndrome |
|         | 1   | M   | Respiratory failure                                      | Diffuse alveolar damage                                          | Respiratory failure due to acute respiratory distress syndrome |
|         | 81  | F   | Respiratory failure                                      | Diffuse alveolar damage                                          | Respiratory failure due to acute respiratory distress syndrome |
|         | 88  | F   | Pan-peritonitis                                          | Septic shock due to pan-peritonitis                              | Septic shock                                                   |
|         | 75  | M   | Acute respiratory distress syndrome                      | Respiratory failure due to septic shock                          | Respiratory failure                                            |
|         | 69  | F   | Sepsis due to febrile neutropenia                        | Respiratory failure due to diffuse alveolar damage               | Respiratory failure due to pneumonia                           |
|         | 63  | M   | Respiratory failure due to pneumonia                     | Respiratory failure due to bronchopneumonia and pleural effusion | Respiratory failure due to pneumonia                           |
|         | 68  | M   | Respiratory failure                                      | Respiratory failure due to bronchopneumonia and pleural effusion | Respiratory failure                                            |
|         | 78  | M   | Pneumonia                                                | Respiratory failure due to aspiration pneumonia                  | Respiratory failure                                            |
|         | 64  | F   | Interstitial pneumonia                                   | Respiratory failure due to idiopathic interstitial pneumonia     | Respiratory failure due to interstitial pneumonia              |
|         | 72  | M   | CO <sub>2</sub> narcosis                                 | Respiratory failure due to CO <sub>2</sub> narcosis              | Respiratory failure due to usual interstitial pneumonia        |
|         | 77  | M   | Respiratory failure                                      | Respiratory failure due to pleuritis carcinomatosa               | Respiratory failure                                            |
|         | 74  | M   | Pulmonary thromboembolism                                | Respiratory failure due to pulmonary embolism                    | Respiratory failure                                            |
|         | 51  | M   | Respiratory failure                                      | Respiratory failure                                              | Respiratory failure                                            |
|         | 14  | F   | Pulmonary hemorrhage                                     | Suffocation                                                      | Respiratory failure                                            |
|         | 45  | F   | Hemorrhagic shock due to gastrointestinal tract bleeding | Hemorrhagic shock due to tumor necrosis                          | Hemorrhagic shock                                              |
|         | 60  | F   | Hemorrhagic shock due to ruptured metastatic liver tumor | Hemorrhagic shock due to perforation of liver tumor              | Hemorrhagic shock                                              |
| Group 2 | 85  | F   | Liver failure                                            | Liver failure                                                    | Liver failure                                                  |
|         | 65  | M   | Acute leukemia                                           | Respiratory failure due to septic shock                          | Respiratory failure due to sepsis and pneumonia                |
|         | 62  | F   | Interstitial pneumonia                                   | Respiratory failure due to diffuse alveolar damage               | Respiratory failure due to acute respiratory distress syndrome |
|         | 79  | M   | Pneumonia                                                | Diffuse alveolar damage                                          | Respiratory failure due to acute respiratory distress syndrome |
|         | 73  | M   | Acute renal failure                                      | Diffuse alveolar damage                                          | Acute respiratory distress syndrome                            |
|         | 62  | M   | Peritonitis carcinomatosa                                | Respiratory failure due to bronchopneumonia and pleural effusion | Respiratory failure due to pneumonia                           |
|         | 46  | M   | Respiratory arrest                                       | Respiratory failure due to pneumonia and pulmonary abscess       | Respiratory failure due to pneumonia                           |
|         | 76  | F   | Cachexia                                                 | Respiratory failure due to pulmonary abscess                     | Respiratory failure due to pulmonary abscess                   |
|         | 86  | M   | Pancreatic head cancer                                   | Respiratory failure due to bronchopneumonia                      | Respiratory failure                                            |
|         | 77  | M   | Metabolic acidosis                                       | Respiratory failure due to bronchopneumonia                      | Respiratory failure                                            |
|         | 65  | M   | Respiratory failure                                      | Severe bronchopneumonia                                          | Respiratory failure due to acute respiratory distress syndrome |
|         | 59  | M   | Hemorrhagic shock due to gastrointestinal tract bleeding | Respiratory failure due to passive atelectasis                   | Respiratory failure due to acute respiratory distress syndrome |
|         | 77  | M   | Acute renal failure                                      | Respiratory failure                                              | Respiratory failure due to passive atelectasis                 |
|         | 71  | M   | Pulmonary hypertension                                   | Respiratory failure                                              | Respiratory failure                                            |
|         | 60  | M   | "So-called" cancer death                                 | Suffocation                                                      | Suffocation                                                    |
|         | 62  | F   | Congestive heart failure                                 | Cardiac tamponade                                                | Cardiac tamponade                                              |
|         | 79  | F   | Acute renal failure due to peritonitis carcinomatosa     | Cardiac tamponade                                                | Respiratory and circulatory failure due to cardiac tamponade   |
|         | 71  | M   | "So-called" cancer death due to metastatic liver cancer  | Liver failure                                                    | Suspect of liver failure                                       |
|         | 62  | M   | "So-called" cancer death                                 | Liver failure                                                    | Suspect of liver failure                                       |
| Group 3 | 68  | M   | Septic shock                                             | Septic shock                                                     | Unknown                                                        |
|         | 68  | M   | Acute myocardial infarction                              | Acute myocardial infarction                                      | Unknown                                                        |
|         | 56  | F   | Multi-organ failure                                      | Multiple-organ failure                                           | Pan-peritonitis                                                |
|         | 71  | M   | Liver failure                                            | Liver failure due to sub-massive liver necrosis                  | Liver abscess                                                  |
| Group 4 | 57  | M   | "So-called" cancer death                                 | Respiratory failure                                              | "So-called" cancer death                                       |
|         | 70  | F   | "So-called" cancer death                                 | Respiratory failure                                              | "So-called" cancer death                                       |
|         | 67  | M   | Esophageal cancer                                        | Pulmonary tumor embolism                                         | Unknown                                                        |
|         | 76  | M   | Unknown                                                  | Suspect of acute circulatory failure                             | Congestive heart failure with unknown reasons                  |
|         | 94  | F   | Sepsis                                                   | Acute circulatory failure                                        | Suspect of respiratory failure                                 |
|         | 66  | F   | Disseminated intravascular coagulation                   | Liver failure                                                    | Respiratory failure due to lung congestion                     |
|         | 60  | F   | Peritonitis carcinomatosa                                | Liver failure                                                    | Cachexia                                                       |
|         | 81  | F   | Acute renal failure due to tumor lysis syndrome          | Liver failure                                                    | "So-called" cancer death                                       |
|         | 64  | F   | Acute leukemia                                           | Hepatorenal failure                                              | Sepsis                                                         |

CT, computed tomography
